# Supplementary material for: Anti-endometriosis Mechanism of Jiawei Foshou San Based on Network Pharmacology
Source: Front Pharmacol. 2018 Jul 26;9:811. doi: 10.3389/fphar.2018.00811 (PMC6071511; doi:10.3389/fphar.2018.00811)
Supplement: TABLE S2 — EMS-related targets and interaction information with JFS-related targets. [file Table_2.xls]

## Sheet: targets
Detail information of EMS-related targets
gene name	Uniprot ID
ABCA4	P78363
ABCB1	P08183
ABCB4	P21439
ABCC4	O15439
ABCC9	O60706
ABCG8	Q9H221
ABI3BP	Q7Z7G0
ACE	P12821
ACSL5	Q9ULC5
ACTA2	P62736
ADAM17	P78536
ADH1B	P00325
ADH1C	P00326
AGL	P35573
AGPAT1	Q99943
AHRR	A9YTQ3
AKR1B1	P15121
AKR1C1	Q04828
AKR1C2	P52895
AKR1C3	P42330
ANKH	Q9HCJ1
ANKRD1	Q15327
ANO4	Q32M45
AOC3	Q16853
APC	P25054
AREG	P15514
ARHGAP28	Q9P2N2
ARPC1B	O15143
ARNT	P27540
ATG16L1	Q676U5
ATP2C1	P98194
BAX	Q07812
BCL2	P10415
BCL2L1	Q07817
BCKDHB	P21953
BMP7	P18075
BMPR2	Q13873
BRCA1	P38398
BRD2	P25440
BRD8	Q9H0E9
C10orf10	Q9NTK1
C1R	P00736
C2CD4A	Q8NCU7
C4BPA	P04003
C7	P10643
C9orf152	Q5JTZ5
CALHM1	Q8IU99
CAPS	Q13938
CAV3	P56539
CCDC146	Q8IYE0
CCL2	P13500
CCNE2	O96020
CD226	Q15762
CD55	P08174
CFD	P00746
CHCHD2	Q9Y6H1
CHRDL1	Q9BU40
CLCC1	Q96S66
CLDN1	O95832
CLDN10	P78369
CLU	P10909
CNIH3	Q8TBE1
CNR1	P21554
COL18A1	P39060
COL8A1	P27658
COPA	P53621
ARCN1	P48444
COPS2	P61201
CPM	P14384
CPS1	P31327
CRB2	Q5IJ48
CTSZ	Q9UBR2
CX3CR1	P49238
CXCL14	O95715
IL8	P10145
CYB5A	P00167
CYP17A1	P05093
CYP19A1	P11511
CYP1A1	P04798
CYP26A1	O43174
DCSTAMP	Q9H295
DDX5	P17844
DES	P17661
DHTKD1	Q96HY7
DICER1	Q9UPY3
DIO2	Q92813
DIRAS3	O95661
PARK7	Q99497
DKK1	O94907
DNAJC6	O75061
DPT	Q07507
DUSP1	P28562
DZIP1L	Q8IYY4
ECE1	P42892
ECM1	Q16610
EEF1A1	P68104
EGFR	P00533
EGR1	P18146
EGR2	P11161
EHF	Q9NZC4
EIF4G1	Q04637
ELAVL1	Q15717
ELOVL4	Q9GZR5
ENPP1	P22413
ERRFI1	Q9UJM3
ESR1	P03372
ESR2	Q92731
FABP4	P15090
FAM180A	Q6UWF9
FBLN1	P23142
FBN1	P35555
PKHD1	P08F94
FGF2	P09038
FIG4	Q92562
FKBP5	Q13451
FMO2	Q99518
FOS	P01100
FOXA2	Q9Y261
FOXP3	Q9BZS1
GABRP	O00591
GADD45A	P24522
GANAB	Q14697
GARS	P41250
GATA4	P43694
GBA	P04062
GBE1	Q04446
GDAP1	Q8TB36
GDF7	Q7Z4P5
GDNF	P39905
GIGYF2	Q6Y7W6
GLE1	Q53GS7
GNB4	Q9HAV0
GPC3	P51654
GPX3	P22352
GREB1	Q4ZG55
GSTM1	P09488
GSTM2	P28161
GSTT1	P30711
GYG1	P46976
HARS	P12081
HBEGF	Q99075
HDAC1	Q13547
HDAC2	Q92769
HERC5	Q9UII4
HEXB	P07686
HFE	Q30201
HLA-DPB1	P04440
HLA-DRB1	P04229
HOOK1	Q9UJC3
HOXA10	P31260
HOXB7	P09629
HOXB8	P17481
HOXD10	P28358
HPGDS	O60760
HS3ST3B1	Q9Y662
HSD11B1	P28845
HSD17B1	P14061
HSD17B2	P37059
HSD17B3	P37058
HSPB1	P04792
HTRA2	O43464
ICAM1	P05362
IDO1	P14902
IFIT1	P09914
IFNG	P01579
IFNGR1	P15260
IGF1	P05019
IGFBP1	P08833
IGFBP6	P24592
IGHMBP2	P38935
IHH	Q14623
IL10	P22301
IL15	P40933
IL1B	P01584
IL1R1	P14778
IL1R2	P27930
IL23R	Q5VWK5
IL4	P05112
IL6	P05231
IL7R	P16871
IMPA2	O14732
INTS1	Q8N201
INVS	Q9Y283
IRGM	A1A4Y4
IRS1	P35568
ITGA2	P17301
ITGB1	P05556
ITGB3BP	Q13352
ITGB8	P26012
JPH1	Q9HDC5
KALRN	O60229
KCNK3	O14649
KCNMB1	Q16558
KDR	P35968
KIAA1324	Q6UXG2
KIF1B	O60333
KIT	P10721
KLF13	Q9Y2Y9
KLF9	Q13886
KRAS	P01116
LAMB1	P07942
LDHA	P00338
LEP	P41159
LIF	P15018
LIPA	P38571
LMNA	P02545
LMO3	Q8TAP4
LMOD1	P29536
LRP5	O75197
LRRK2	Q5S007
LRSAM1	Q6UWE0
LTF	P02788
MAL2	Q969L2
MALAT1	NA
MAOA	P21397
MAOB	P27338
MED1	Q15648
MED14	O60244
MED16	Q9Y2X0
MED17	Q9NVC6
MED4	Q9NPJ6
METTL7A	Q9H8H3
MFN2	O95140
MIPEP	Q99797
MMP1	P03956
MMP11	P24347
MMP12	P39900
MMP13	P45452
MMP14	P50281
MMP2	P08253
MMP3	P08254
MMP7	P09237
MMP9	P14780
MRPS12	O15235
MSRB2	Q9Y3D2
MT1F	P04733
MT1G	P13640
MT1H	P80294
MT1HL1	P0DM35
MT1X	P80297
MT2A	P02795
MTA1	Q13330
MTA2	O94776
MTHFR	P42898
MYLIP	Q8WY64
NBR1	Q14596
NCF1	P14598
NCF2	P19878
NCOA1	Q15788
NCOA6	Q14686
NCOR1	O75376
NDNF	Q8TB73
NDRG1	Q92597
NEDD4L	Q96PU5
NEFL	P07196
NEFM	P07197
NFASC	O94856
NFKBIA	P25963
NIPAL3	Q6P499
NOS3	P29474
NR1D2	Q14995
NR2C1	P13056
NR2C2	P49116
NR2F2	P24468
NR2F6	P10588
NR3C1	P04150
NR3C2	P08235
NR4A1	P22736
NR5A1	Q13285
NRP1	O14786
NTRK3	Q16288
NUMA1	Q14980
OLFM4	Q6UX06
OSR2	Q8N2R0
PAIP2B	Q9ULR5
PAMR1	Q6UXH9
PAPPA	Q13219
PARP3	Q9Y6F1
PAX2	Q02962
PCNA	P12004
PDCD1	Q15116
PDE11A	Q9HCR9
PDE8B	O95263
PDLIM3	Q53GG5
PDZD7	Q9H5P4
PGAM2	P15259
PGR	P06401
PHB2	Q99623
PHYH	O14832
PINK1	Q9BXM7
PKD2	Q13563
PLA2G2A	P14555
PLEKHG5	O94827
PLXNC1	O60486
PNPLA2	Q96AD5
POGLUT1	Q8NBL1
PON2	Q15165
PPARG	P37231
PPM1K	Q8N3J5
PPP3CA	Q08209
PRKAG2	Q9UGJ0
PRKN	O60260
PRL	P01236
PRLR	P16471
PROM1	O43490
PRSS8	Q16651
PSAP	P07602
PSEN2	P49810
PTEN	P60484
PTGER2	P43116
PTGER3	P43115
PTGER4	P35408
PTGFR	P43088
PTGS2	P35354
PTPN22	Q9Y2R2
PTPRO	Q16827
PYGM	P11217
RAF1	P04049
RARB	P10826
RASGRP1	O95267
RASL11A	Q6T310
RBPJ	Q06330
RET	P07949
RGS4	P49798
RHCE	P18577
RIMKLB	Q9ULI2
FAM82B	Q96DB5
RORB	Q92753
RPL13A	P40429
RPS16P5	NA
RPS21	P63220
RPS26	P62854
RXFP1	Q9HBX9
SAR1B	Q9Y6B6
SBF2	Q86WG5
SCGB3A1	Q96QR1
SEC63	Q9UGP8
SELENOP	P49908
SERPINE1	P05121
SERPINF1	P36955
SH3KBP1	Q96B97
SH3TC2	Q8TF17
SLC16A6	O15403
SLC17A5	Q9NRA2
SLC1A1	P43005
SLC20A1	Q8WUM9
SLC25A16	P16260
SLC26A4	O43511
SLC40A1	Q9NP59
SLC7A8	Q9UHI5
SLURP1	P55000
SMPD1	P17405
SMPDL3A	Q92484
SNCA	P37840
SP110	Q9HB58
SPARCL1	Q14515
SQSTM1	Q13501
SRD5A1	P18405
SRD5A2	P31213
SST	P61278
STC2	O76061
SUCLG2	Q96I99
SULF2	Q8IWU5
SURF1	Q15526
TACSTD2	P09758
TAGLN	Q01995
TBP	P20226
TCF21	O43680
TGFB1	P01137
TGFB2	P61812
TGM2	P21980
THBS1	P07996
THRA	P10827
TIMP1	P01033
TIMP2	P16035
TLR5	O60602
TNC	P24821
TNF	P01375
TNFRSF1B	P20333
TNNI3K	Q59H18
TOB1	P50616
TP53	P04637
TREM2	Q9NZC2
TRIM2	Q9C040
TRH	P20396
TSC22D1	Q15714
TXNIP	Q9H3M7
UCHL1	P09936
UGT2B11	O75310
UST	Q9Y2C2
VCAN	P13611
VCP	P55072
VEGFA	P15692
WIF1	Q9Y5W5
WNT4	P56705
WNT7A	O00755
YARS	P54577
ZAP70	P43403
ZBBX	A8MT70
ZFAT	Q9P243
ZNF687	Q8N1G0

## Sheet: interaction information
Interaction information of JFS-related targets and EMS-related targets
node 1	node 2
PCNA	RFC4
PRLR	PRL
EIF4G1	EIF4A2
RPL13A	RPS26
KRAS	RAF1
COPS2	COPS3
VEGFA	KDR
TNF	TNFRSF1B
RPS26	RPS21
ARPC1B	ARPC3
PLAU	SERPINE1
AGL	PYGM
RPS28	RPS21
RELA	NFKBIA
TIMP2	MMP2
SNRPE	PRPF4
NCF2	NCF1
RPS28	RPS26
SRP19	SRP68
COPA	ARCN1
CALM1	NOS3
MMP14	TIMP2
TOP2A	TOP1
IL1B	IL1R1
PINK1	PARK2
GDNF	RET
NCOA1	ESR1
BCL2	TP53
TP53	CDKN1A
TLR4	IKBKG
SYVN1	VCP
NCOA1	NR3C1
MMP9	TIMP1
HDAC1	MTA1
EGFR	KRAS
CALM1	NOS2
BAX	TP53
CDKN1A	CCND1
CYCS	BCL2L1
IGF1	IGFBP1
PCNA	CDKN1A
HSP90AA1	HSP90AB1
RPL13A	RPS21
PCNA	RPA2
IL1R2	IL1B
FOS	MAPK1
DUSP1	MAPK1
BCL2L1	BAX
IFNGR1	IFNG
PTEN	TP53
RXRA	NCOA1
EGFR	TP53
VEGFA	HIF1A
MED16	MED17
MED14	MED17
CAMK2A	CALM1
GBE1	PYGM
NCOA1	PPARG
TOP2A	PCNA
F3	F2
BACE1	APP
BAD	BCL2L1
GSTM1	GSTT1
MMP1	TIMP1
BCL2	CYCS
TNF	IKBKG
CYCS	BAX
PPP3CA	CALM1
NRP1	KDR
TP53	EP300
PCNA	TP53
HDAC2	SMARCA5
MED1	MED17
MMP3	TIMP1
GBE1	AGL
PCNA	CCND1
MED14	MED4
FOS	MAPK3
HDAC1	SMARCA5
NCOR1	ESR1
MAP2K2	RAF1
MTOR	IRS1
IKBKG	NFKBIA
RELA	IKBKG
EGFR	HBEGF
CCND1	ESR1
BRCA1	TP53
HDAC1	TP53
BMP7	BMPR2
MED16	MED14
NFE2L2	HMOX1
ARNT	HIF1A
IRS1	IGF1
RPS28	RPL13A
HDAC1	MTA2
VEGFA	TGFB1
SNRPE	SNW1
MED4	MED17
VEGFA	THBS1
VEGFA	IGF1
CCNE2	CDKN1A
MAPK3	DUSP1
MED1	MED4
LEP	PPARG
HDAC1	EP300
MED14	MED1
HSP90AA1	TP53
BCL2	MAPK1
GSTM1	GSTM2
IFIT1	STAT1
MTOR	EGFR
HIF1A	TP53
GADD45A	TP53
TOP2A	RANBP2
PINK1	MFN2
BCL2L1	TP53
HDAC2	MTA1
HSP90AA1	NR3C1
PTPN1	IRS1
RPL13A	MRPS12
LEP	IRS1
DYNC1I2	DYNC1LI2
IFIT1	HERC5
MAPK3	MAP2K2
MAP2K2	MAPK1
MED16	MED4
PCNA	GADD45A
HSP90AA1	NOS3
STAT1	IL6
DKK1	LRP5
MMP9	VEGFA
HSP90AA1	EGFR
IL1B	IL6
PARK2	SNCA
VEGFA	EGFR
HPGDS	GSTT1
CYP1A1	GSTM1
RELA	IL8
HDAC2	MTA2
TP53	TBP
PRL	ESR1
FOS	EGR1
RXRA	NCOR1
IGF1	ESR1
PARK2	MFN2
FOS	TP53
EP300	TBP
FKBP5	HSP90AA1
MED16	MED1
SERPINE1	TGFB1
IL8	IL1B
HSP90AA1	MAPK1
KRAS	MAPK1
TGFB1	TIMP1
FOS	CCND1
MMP2	TIMP1
FGF2	KDR
IGF1	TGFB1
FOS	IL6
PTGS2	MAPK1
IL6	MAPK1
EIF1	EIF4G1
IL8	IL6
STAT1	IFNG
HSD17B1	HSD17B2
PTPN1	EGFR
SNCA	APP
PPARG	FABP4
VEGFA	HSP90AA1
NOS3	ESR1
VEGFA	SERPINE1
GTPBP4	MAK16
CXCL1	IL8
TNF	IL1B
CYP1A1	GSTT1
CXCL2	CXCL1
BCAR1	PTPN1
TP53	MAPK1
ESR2	NCOA1
FOS	ESR1
RANBP2	NUP155
BRCA1	ESR1
NCOA1	EP300
PARK7	SNCA
FGF2	MAPK3
PTGS2	FOS
NCOA1	NCOR1
RPL13A	EEF1A1
TP53	MMP2
NCOA1	THRA
NOS3	KDR
PLAU	MMP9
IL8	FOS
COL18A1	MMP2
HDAC2	TP53
HIF1A	HSP90AA1
EGR1	MAPK1
NR4A1	BCL2
IL10	IL6
HSD17B3	HSD17B2
CA9	HIF1A
HSP90AA1	KDR
RELA	EP300
LDHA	HIF1A
MAPK3	KRAS
TNF	IL6
HDAC1	NCOR1
IL10	IL4
HDAC2	EP300
IGF1	MAPK1
BAD	RAF1
IL8	EGFR
PTGS2	MAPK3
MMP1	FOS
PPARG	NCOR1
CYCS	HSPB1
ALOX5	PTGS2
GLE1	DDX19B
FOS	EP300
TNF	RELA
CLU	APP
VEGFA	MMP2
FGF2	MAPK1
MAPK3	MAPK1
MAP2K2	KRAS
IFNGR1	STAT1
STAT1	KIT
HIF1A	EP300
BCL2	BCL2L1
IL10	TNF
VEGFA	ARNT
PTPN22	ZAP70
SNW1	DDX5
HDAC2	HDAC1
TNF	IFNG
IL6	IL4
BCL2	FKBP8
MAPK3	IL6
TNC	VCAN
ADAM17	HBEGF
RARB	NCOR1
CXCL2	IL8
MTA1	MTA2
BRCA1	RFC4
BCAR1	ESR1
IGF1	MMP2
RELA	MMP9
NCOR1	EP300
IGF1	IGFBP6
PTPN1	LEP
IL23R	IL6
AKR1C1	AKR1C3
FOS	IL4
MTOR	HSP90AA1
CALM1	SCN5A
STAT1	MAPK1
MMP14	TIMP1
PICALM	AP2A1
HDAC2	RELA
EP300	ESR1
VCP	HSP90AA1
HIF1A	EGFR
IRS1	MAPK1
VEGFA	KIT
EIF1	EIF4A2
IL6	CCL2
TOP2A	RFC4
THBS1	TGFB1
MAPK1	ESR1
CYP1A1	HPGDS
MTOR	BCL2
HLA-DRB1	PTPN22
NCOR1	NR3C1
TP53	SERPINE1
IGF1	MAPK3
HDAC2	NCOR1
FOS	NR3C1
IFNG	TGFB1
HDAC1	TBP
THBS1	TIMP1
IRS1	IL4
EP300	NR3C1
RELA	ICAM1
TP53	ABCB1
APP	TGFB1
CYCS	COX6C
HIF1A	HMOX1
MTOR	CLIP1
PRKCA	MTOR
TNF	ADAM17
DRD2	SLC6A3
FOS	CCL2
MAPK3	EGR1
TP53	MAPK3
RXRA	THRA
TNF	FOS
RELA	FOS
NFE2L2	CRYZ
PTEN	FOS
BCL2	BAD
TP53	CCND1
PLA2G2A	PTGS2
TNF	IL8
HSD17B3	CYP17A1
ITGB1	ITGA2B
PINK1	PARK7
BCL2	MAPK3
VEGFA	TIMP1
ALOX5	LTA4H
RELA	IL6
SERPINE1	TIMP1
EIF4G1	HSPB1
GSTT1	GSTM2
RPS6KA3	MAPK1
IL10	IFNG
RAF1	MAPK1
RPS21	MRPS12
RBPJ	SNW1
HSD17B1	CYP19A1
GARS	YARS
MED1	ESR1
RPS26	EEF1A1
BRCA1	PCNA
PTGS2	ALOX15
EP300	CDKN1A
NR4A1	MED1
EGFR	FGF2
IGF1	EGFR
PLAU	EGFR
SNCA	SLC6A3
VEGFA	FGF2
MMP9	HBEGF
STAT1	EP300
RPS28	MRPS12
HDAC1	CCND1
DHX8	SNW1
PAPPA	IGF1
STAT1	EGFR
PPARG	IL4
PGR	NCOR1
RXRB	THRA
MMP9	THBS1
VEGFA	EP300
MAPK3	TGFB1
NCOR1	THRA
NCOA1	MED1
IL4	IFNG
IFNG	MAPK1
RPS6KA3	MAPK3
IL6	IFNG
ESR2	NOS3
DCTN2	DYNC1I2
PTEN	MTOR
DCTN2	CLIP1
RELA	CCND1
EGFR	MAPK1
RELA	NR3C1
ADRB2	CFTR
HDAC1	ESR1
TP53	PIN1
HIF1A	SERPINE1
IRS1	MAPK3
TP53	DUSP1
RPS21	EEF1A1
HSP90AA1	KRAS
MAPK3	RAF1
STAT1	MAPK3
CLU	IGF1
LEP	PRL
PLAU	FOS
TGFB2	APP
RPL13A	SRPR
ARNT	EP300
WNT4	WIF1
CX3CR1	CCL2
RXRA	MED1
F2	IGF1
DDX50	DHX8
CXCL2	CXCL3
TRH	PRL
STAT1	HERC5
NR3C2	NCOA1
HIF1A	CDKN1A
MMP9	TIMP2
ITGB1	ITGA2
PLAU	MAPK1
CLU	TGFB1
PCNA	EP300
CYP1A2	GSTM1
AKR1C3	SRD5A1
TIMP2	MMP13
NDRG1	TP53
SQSTM1	PARK2
TNFRSF1B	ADAM17
IL10	IL8
MMP14	MMP2
KIT	KRAS
PPARG	EP300
RPS26	MRPS12
PGR	MAPK1
MED1	PPARG
APP	TTR
LDHA	ARNT
CNR1	DRD2
RPA2	RFC4
FOS	IL1B
RBPJ	CCND1
TNF	IL4
BCKDHB	PPM1K
PCNA	ESR1
NFKBIA	MAPK1
NCOA6	MED1
LMOD1	ACTA2
IL7R	IL4
TGFB1	MAPK1
CXCL1	CXCL3
EGFR	ESR1
HDAC1	RBPJ
IL10	IL1B
PSAP	GBA
SMARCA5	TBP
RPA2	TP53
BRD2	PRL
STAT1	BCL2
MAPK3	NFKBIA
BCL2	BAX
VCP	HSP90AB1
GBE1	GYG1
TBXAS1	PTGS1
CCNE2	TP53
RET	KRAS
MMP9	COL18A1
TLR4	IL6
FOXA2	IGFBP1
THBS1	SERPINE1
CYP1A2	HPGDS
RAF1	PIN1
PRKCA	NFKBIA
NCOA6	NCOA1
PPARG	TGFB1
PRPF4	SNW1
MAPK3	ESR1
FOS	TGFB1
MED1	THRA
RELA	PPARG
HDAC2	TBP
HDAC2	CDKN1A
MTA1	ESR1
ACSL5	CPT1A
MTOR	CYCS
RBPJ	NCOR1
PGR	ESR1
SNCA	UCHL1
NOS2	NFKBIA
ALOX5	PTGS1
FOS	DUSP1
HSD17B3	SRD5A1
TP53	VCAN
IGF1	SERPINE1
HDAC1	NFKBIA
F2	CFTR
STAT1	BCL2L1
RXRA	EP300
HDAC1	RANBP2
CYP1A1	UGT1A7
ICAM1	IL6
RXRA	NCOA6
HSP90AA1	CDKN1A
CYP1A2	GSTT1
HSPB1	ESR1
SH3KBP1	EGFR
RELA	NOS2
PRKCA	EGFR
AKR1C2	SRD5A1
AKR1C1	SRD5A1
VCP	CFTR
RELA	IL1B
ITGB1	THBS1
HMGA1	TP53
IL10	FOXP3
DHFR	GGH
GREB1	ESR1
RXRB	NCOA1
CKAP5	CLIP1
IL8	HBEGF
NCF1	DECR1
PICALM	EGFR
NR4A1	EP300
ESR2	MED1
NFASC	SCN5A
RXRA	PPARG
GSN	APP
MED1	EP300
NCOA6	EP300
UGT1A7	CYP1A2
IGF1	TIMP1
CYP17A1	SRD5A1
IGF1	LIF
HIF1A	NOS3
RELA	MAPK1
PLEKHG5	RHOB
COPS2	NCOR1
HSD17B3	CYP19A1
CYP19A1	HSD17B2
VEGFA	ITGB1
RELA	MAPK3
FOS	MMP2
CYP17A1	HSD17B2
PTGS2	IL1B
RXRB	NCOR1
TOP2A	NCAPH
CFD	SERPINE1
LDHA	EP300
SURF1	CYCS
PRKCA	MAPK1
IGF1	HBEGF
MAPK3	IFNG
GADD45A	CCND1
MMP9	MMP7
TOP2A	NUP155
MED1	NCOR1
PRKCA	MAPK3
DRD2	SST
OPRM1	CNR1
PRKCA	RAF1
FOS	IFNG
SRD5A1	HSD17B2
PTGS2	HPGDS
RXFP1	GNB4
TNF	ICAM1
FOS	HMOX1
IGF1	RAF1
SRPR	SRP68
BCL2	EP300
BRCA1	GADD45A
ITGB1	TGFB1
CYP1A1	GSTM2
COL18A1	TP53
PRKAR1A	MAPK1
KIT	PTPRO
NCOR1	SNW1
PLAU	F2
SNCA	LRRK2
F2	APP
NCOA1	MED4
RPS26	EIF4A2
SQSTM1	PINK1
TNF	CCL2
FOS	TIMP1
ITGB8	TGFB1
RBPJ	EP300
VEGFA	TGFB2
PLA2G2A	ALOX5
PRKCA	KRAS
PLA2G2A	ALOX12
F2	MAPK1
SRD5A1	CYP19A1
SMARCA5	EP300
PTGS1	ALOX12
GPX3	GSTT1
RELA	IL4
ITGB1	KDR
FGF2	KRAS
GPX3	HPGDS
RPS28	EEF1A1
ESR2	FOS
PRKCA	KIT
IL7R	IL15
PLAU	MAPK3
HSD17B1	CYP1A1
MTA2	TP53
CYP17A1	CYP19A1
MMP1	IGF1
IGF1	THBS1
DUSP1	NR3C1
OPRM1	SST
APP	MAPK3
PSEN2	APP
PTGS2	ALOX12
RXRA	RARB
BMP7	GATA4
PGR	MED1
HBEGF	MMP2
IRS1	PRL
EGFR	CFTR
VEGFA	TP53
PTPN1	IGF1
TGFB2	IGF1
BAX	EP300
RELA	IL1R1
G6PD	PGD
CNR1	SST
NEDD4L	RAF1
EP300	SNW1
RELA	BAX
IGF1	APP
PRKCA	ELAVL1
IL23R	IFNG
VEGFA	IL6
KIT	FGF2
TP53	LIF
PLA2G2A	PTGS1
RPL13A	EIF4A2
CKAP5	HSP90AA1
APP	THBS1
MTOR	TP53
DRD2	DRD4
CA9	ARNT
HDAC2	SNW1
C7	CLU
ARIH1	IFIT1
TGM2	ITGB1
OPRM1	OPRD1
AKR1C3	CYP17A1
VEGFA	APP
MED14	PPARG
PARK2	LRRK2
KRAS	PPP2CB
IL10	TLR4
PARK2	PARK7
EIF4A2	DHX8
ITGB1	EGFR
RELA	TGFB1
SUCLG2	DHTKD1
MMP14	MMP13
TNF	TLR4
EP300	NFKBIA
PTGS1	ALOX15
PRKCA	NCF1
MMP3	HBEGF
RXRB	RARB
STAT1	IL23R
ESR2	ESR1
SNCA	BAD
BRCA1	RPA2
GPC3	IHH
PCNA	VCP
GPX4	GSTT1
RELA	IFNG
HTR1A	SST
PRKCA	NFE2L2
CLU	TIMP1
COL18A1	MMP3
IL8	SST
COL18A1	ITGB1
MMP1	MMP7
TGFB2	SERPINE1
IL8	CCL2
COL18A1	MMP7
CYP1A1	CYP19A1
SNX1	SNX2
APP	MAPK1
SMPD1	GBA
NFE2L2	FOS
IL8	IL4
HDAC2	RBPJ
AKR1C3	CYP19A1
MMP9	MMP1
GSN	CYCS
LIF	HBEGF
GSTM1	ADH1B
FOS	EGFR
TGFB2	TGFB1
GADD45A	EP300
TGFB2	THBS1
HLA-DRB1	IFNG
SST	OPRD1
RXRA	FABP4
IL23R	IL1B
IGFBP1	NR3C1
IL8	APP
F2	RAF1
TBXAS1	PTGS2
BCAR1	VEGFA
ARNT	KDR
HLA-DPB1	HLA-DRB1
SST	APP
PTGS2	IL8
IRS1	KRAS
ADRA1A	ADRA1B
MMP9	NCF1
RXRB	MED1
VEGFA	CLU
MMP9	MMP3
F2	TRH
ARNT	NCOA1
ADRB2	EGFR
HDAC1	SNW1
ITGB1	TNC
ADRA1A	ADRA1D
ADH1B	GSTT1
MMP9	MMP13
APP	TIMP1
MTOR	FKBP5
RELA	KRAS
FOS	MT2A
HIF1A	LEP
MMP3	MMP2
CYP19A1	ESR1
DKK1	TP53
RELA	MTOR
IL10	CCL2
MED14	EP300
THBS1	MMP2
MMP1	MMP3
ARNT	HMOX1
TGFB2	TIMP1
LRRK2	EGFR
RARB	EP300
RAF1	PPP2CB
BCAR1	ITGB1
NR3C1	SERPINE1
RBPJ	CDKN1A
IL8	ICAM1
CYP1A2	GSTM2
MMP1	EP300
HLA-DPB1	PTPN22
MMP1	MMP2
TGFB1	MMP2
TP53	ESR1
PLA2G2A	ALOX15
IL8	CXCL3
ARHGAP1	RHOB
BCAR1	IGF1
BCAR1	IRS1
EP300	MED4
NCF1	MMP2
PRKCA	DECR1
PTGER3	IL8
IL1B	CCL2
NCOA1	PRL
PPARG	HSD11B1
ITGA2	TNC
FOXP3	TGFB1
HIF1A	NOS2
TGFB2	IHH
ROCK2	RHOB
TGM2	ADRA1B
MMP7	TIMP1
MAN1B1	GANAB
PTEN	ROCK2
PDS5A	RANBP2
HLA-DRB1	PDCD1
CYP1A1	CYP26A1
ITGB1	LAMB1
MMP13	MMP2
HIF1A	NCOA1
CKAP5	DCTN2
TP53	KRAS
IL10	IL7R
PRL	APP
RBPJ	IL4
CXCL1	SST
PRL	HBEGF
CKAP5	RANBP2
MMP9	NCF2
GPX4	HPGDS
KRAS	HBEGF
HSP90AA1	DUSP1
MAP2K2	IL6
DRD3	CNR1
FOXP3	IL6
ICAM1	CCL2
BAD	CYCS
ITGA2B	RAF1
IL1B	IFNG
HIF1A	NDRG1
TP53	APC
APP	OPRD1
MAPK3	ITGA2B
ICAM1	IL1B
DHX8	DDX5
NOS3	EP300
CRYZ	FOS
HTR2A	TRH
NOS3	DECR1
IQGAP3	CLIP1
EP300	EGR2
DRD2	APP
CFD	IGF1
PRLR	IRS1
GSTM1	HPGDS
HDAC1	CCNE2
SCN5A	KCNH2
APP	SERPINE1
ITGA2B	THBS1
MMP9	TGFB1
GPX3	GSTM1
OPRM1	DRD2
GYG1	AGL
PTEN	EGFR
SQSTM1	MFN2
HTR2A	APP
CALD1	MAPK1
CYP1A2	CYP26A1
CLU	SERPINE1
IFIT1	MAPK3
HIF1A	NR3C1
GYG1	PYGM
CNR1	IL8
PTGS1	HPGDS
AP2A1	EGFR
HTR3A	HTR1A
MAP2K2	ITGA2B
RFC4	TP53
HSD17B1	HSD17B3
CA9	EP300
AKR1C1	CYP1A1
DNAJC6	AP2A1
DCTN2	DYNC1LI2
MED1	SNW1
BCL2	ITGA2B
LEP	EP300
COL18A1	MMP13
MED1	FABP4
VEGFA	NRP1
IL1B	EP300
BCAR1	KDR
NR3C1	ESR1
ADRA2C	ADRA2A
ARNT	SERPINE1
CLU	THBS1
FOXP3	FOS
PTGS2	IL6
SRP19	SRPR
PPP2CB	MAPK1
CAMK2A	KRAS
PRKCA	ICAM1
IRS1	EGFR
CXCL1	IL6
NCOA6	NCOR1
EGFR	AREG
ECM1	TIMP1
CALD1	ACTA2
CYP1A1	HSD11B1
EP300	FABP4
MMP14	LAMB1
ERRFI1	EGFR
NCF2	DECR1
GPX3	GSTM2
PTEN	ITGB1
COL18A1	ESR1
ADH1B	HPGDS
CFD	APP
RELA	RAF1
HIF1A	IGFBP1
RPL13A	EIF4G1
PRKCA	AP2A1
HLA-DPB1	ICAM1
IL7R	IL6
CNR1	APP
IGF1	KDR
PSEN2	ESR1
MAOA	ADH1B
RXRA	LEP
TRH	HTR2C
PRKCA	GNB4
TLR4	TLR5
MMP9	CTRB1
EP300	MED17
MED14	NCOA1
OPRM1	IL8
CYP1A1	HSD17B2
MAPK3	PPP2CB
IFIT1	EGR1
AKR1C3	HPGDS
NCF2	MMP2
NEDD4L	TGFB1
RELA	PLAU
TGFB2	FOS
RXRA	CYP1A1
HIF1A	ABCB1
HTR1A	APP
HIF1A	ABCG2
RANBP2	PPP2CB
NCOR1	MED4
ITGA2B	MAPK1
SST	DRD4
HLA-DRB1	ICAM1
PTGER4	PTGER2
IL23R	CCL2
CXCL1	IL23R
ARNT	NOS3
VEGFA	CFD
RET	IRS1
RELA	APP
RHOB	KALRN
MED1	NR2F6
BRCA1	RDBP
NCOA1	LEP
VEGFA	IL8
VEGFA	NOS3
LRSAM1	HERC5
SNRPE	RANBP2
SAR1B	CNIH3
NR2C1	MED1
CNR1	OPRD1
RXRA	ABCB4
PRKAR1A	ADRB2
AKR1C3	CYP1A1
CYP1A1	CYP17A1
BAD	MAPK3
MTOR	PRKAG2
HPGDS	GSTM2
IL6	TGFB1
RASGRP1	KRAS
ICAM1	IL4
F2	ADRB2
FOXA2	F2
PTPN1	ITGA2B
CNR1	HTR1A
MMP2	MMP11
CYP17A1	CYP1A2
VEGFA	PTGS2
TNF	PTGS2
ADRB1	ADRB2
MED14	NCOR1
HIF1A	HBEGF
ESR2	MAPK1
PPP3CA	CYCS
OPRM1	CXCL1
MAOB	ADH1B
RPS28	EIF4G1
AKR1C1	CYP17A1
WIF1	WNT7A
POTEI	LRRK2
RARB	MED1
VEGFA	ECM1
HTR2A	F2
TNF	VEGFA
PRKCA	RELA
APP	HTR2C
VEGFA	CCL2
ECM1	THBS1
PTGER3	APP
BAD	MAPK1
VEGFA	BCL2
DNAJC6	PICALM
GPC3	HS3ST3B1
NCOR1	FABP4
FOXP3	IFNG
CYP1A1	NCOA1
ADRB2	GNB4
HLA-DPB1	PDCD1
MTA2	EP300
MMP9	IL8
LEP	MED1
F2	KALRN
TBXAS1	HPGDS
ITGB3BP	SPDL1
CFD	CLU
PTGER3	SST
PLAU	ITGB1
HDAC1	MED1
CTRB1	MMP3
NR2C2	MED1
GPX4	GSTM2
GPC3	VCAN
RELA	TLR4
CFD	TIMP1
NOS2	IL23R
PPP3CA	PPP2CB
ADRA2C	DRD4
TRH	APP
ELAVL1	SNW1
DRD2	HTR1A
DRD2	CHRM2
HDAC1	SERPINE1
PTGER3	GNB4
FOXP3	IL4
GNB4	MAPK1
IL10	ICAM1
PRKCA	ADAM17
APP	KALRN
CNR1	PTGER3
CALD1	MAPK3
GPX4	GSTM1
ROCK2	KDR
LMOD1	CALD1
ADRA1D	F2
RXRA	EGR2
CNR1	DRD4
CFD	THBS1
EGFR	PPP2CB
SQSTM1	IL1B
ITGA2B	KRAS
PRKAR1A	CFTR
RXRA	CPT1A
GDNF	IRS1
RELA	TGFB2
OPRM1	HTR1A
ADRA1B	TRH
CHRM4	SST
BMPR2	GATA4
PRKCA	RET
FOS	FABP4
ECM1	TGFB1
ADRA2A	GNB4
ARNT	CDKN1A
DCTN2	HSP90AA1
UGT1A7	CYP19A1
ADRB1	GNB4
RPS6KA3	MTOR
PTGER2	GNB4
CXCL1	APP
ABCB1	EP300
SCD	ACOT1
DRD1	GNB4
GPR27	GNB4
ADRA2B	GNB4
DRD3	SST
CHRM2	OPRD1
ADRA1A	GNB4
ELAVL1	DDX5
GNB4	DRD4
CNR1	ADRA2A
CCNE2	EP300
HTR1A	GNB4
ADRA1B	GNB4
DRD2	IL8
DRD3	GNB4
NCOA1	FABP4
FBN1	ITGB1
PIN1	MAPK1
CNR1	GNB4
PTGS2	TP53
HTR2A	GNB4
GDNF	KRAS
ARNT	LEP
OPRD1	GNB4
ADRA1D	GNB4
DRD5	GNB4
NCOA1	MED17
HSP90AA1	HBEGF
OPRM1	GNB4
UGT2B11	CYP1A1
DRD2	GNB4
HERC5	MAPK3
ADRA2C	GNB4
PTGER4	GNB4
PTGFR	GNB4
HTR2C	GNB4
IL4	CCL2
ALOX5	ALOX15
HLA-DRB1	ZAP70
CHRM2	SST
MAPK3	GNB4
RELA	SQSTM1
PINK1	LRRK2
GDNF	PRKCA
MMP7	MMP11
COL18A1	COL8A1
DRD3	DRD4
ADRA1B	APP
PDS5A	SPDL1
ADRA1B	ADRB2
IGF1	KIT
ARNT	NOS2
OPRM1	DRD4
HTR1A	IL8
PTPN1	IFNG
OPRM1	PTGER3
CKAP5	SPDL1
IL10	IL23R
HDAC1	COPS2
OPRM1	APP
VCP	RFC4
CHRM1	APP
ECM1	IGF1
CLIP1	RANBP2
F2	HTR2C
MMP1	MMP11
CHRM2	APP
ECM1	SERPINE1
IDO1	CYP1A1
GPX3	ALOX15
BCAR1	HSP90AA1
ICAM1	MT2A
PRKCA	BCAR1
AKR1C3	UGT1A7
GGH	GSTT1
CAMK2A	STAT1
BCKDHB	DHTKD1
IL23R	NFKBIA
FOXA2	CPT1A
MED16	NCOA1
NEDD4L	LRSAM1
DNAJC6	EGFR
CHRM1	ADRB2
ALOX5	ALOX12
PRPF4	DDX5
ECM1	CLU
RELA	IL23R
SRP19	RPS21
LEP	PRKAG2
IL15	IL4
AKR1C1	UGT1A7
SST	ADRA2A
CFD	TGFB1
PCNA	CCNE2
F2	MAP2K2
UGT2B11	CYP1A2
VEGFA	COL18A1
RXRA	NR4A1
UGT2B11	AKR1C3
PRKAR1A	BCL2
HSP90AB1	NOS3
ADRA2A	DRD4
NOS3	ACE
UGT2B11	AKR1C1
UGT2B11	CYP19A1
UGT2B11	CYP26A1
HTR2C	CHRM3
RPS26	EIF4G1
IGF1	PRL
ARIH1	HERC5
RPS6KA3	AP2A1
GPX3	ALOX5
CHRM4	DRD2
DNAJC6	SNX2
SQSTM1	NFKBIA
PRKAR1A	F2
DYNC1I2	HSP90AA1
CHRM4	ADRA2B
UGT1A7	CYP26A1
LEP	IL6
NEDD4L	HERC5
HTR2A	CHRM1
UGT2B11	HSD11B1
ITGB3BP	SMARCA5
BCAR1	RET
ARPP19	PPP2CB
NEDD4L	PARK2
MMP7	MMP2
ADRA2C	DRD3
COL18A1	LAMB1
UGT1A7	HSD11B1
HSP90AA1	NRP1
DRD3	HTR1A
CKAP5	PDS5A
TGFB2	CLU
PRLR	HBEGF
GDNF	BCAR1
IL10	TGFB1
RPS21	EIF4A2
NR5A1	MED1
ADRB2	PTGER2
OPRM1	DRD3
DRD3	APP
CHRM2	DRD4
NCOR1	MED17
CNR1	CHRM2
CHRM4	CNR1
PTGER3	HTR1A
PAWR	NFKBIA
DRD2	OPRD1
HTR2A	CHRM3
CPT1A	EP300
CCND1	MAPK1
CHRM2	ADRB2
HSD17B1	UGT2B11
SCD	ACOT2
HSD17B1	UGT1A7
CHRM4	ADRA2C
MTA1	TBP
DRD2	PTGER3
PRKAR1A	ITGB1
ADRA2C	DRD2
OPRM1	CHRM2
HSP90AB1	CDKN1A
OPRD1	DRD4
OPRM1	ADRA2A
RXRA	MED14
APP	LTF
F2	CHRM1
BCAR1	ITGA2B
AKR1C3	CYP1A2
EGFR	CCND1
GTPBP4	DDX5
DRD3	CHRM2
CXCL1	PTGER3
NR2F2	PPARG
F2	CHRM3
ADRA2B	DRD3
HTR1A	DRD4
CXCL1	IL1B
DRD3	IL8
PICALM	SNX2
TP53	PPP2CB
MTA2	TBP
NCOR1	EGR2
IDO1	MAOA
ADRB2	HTR2C
HSP90AA1	ROCK2
ADRA1D	HTR2A
ADRA1D	CHRM1
DRD2	ADRA2A
AP2A1	ARPC3
ARNT	IGFBP1
SCD	ACOT4
CHRM1	HTR2C
CXCL1	CNR1
RFC4	EP300
VEGFA	MTOR
CHRM4	DRD3
CHRM5	HTR2A
TLR4	IL4
HTR1A	ADRA2A
RORB	MED1
ADRA1A	CHRM1
CYP1A1	MED1
CHRM1	TRH
MMP3	MMP7
ADRA1A	HTR2A
CKAP5	ITGB3BP
ADRB2	PTGER4
PPARG	MED4
ADRA2B	APP
CHRM5	HTR2C
ADAM17	IHH
MMP13	MMP7
SNRPE	DDX5
SRP19	RPL13A
NEDD4L	MYLIP
CHRM4	ADRA2A
ADRA2B	DRD2
PTGER3	ADRA2A
ARNT	NDRG1
SNRPE	NUP155
RXFP1	PTGER4
RXFP1	GPR27
MMP9	MMP2
RPS21	EIF4G1
CKAP5	PPP2CB
PTGFR	F2
TRH	KALRN
ADRA2B	ADRA2C
ADRA1D	TRH
DIO2	UGT2B11
HLA-DPB1	ZAP70
ELAVL1	PRPF4
IDO1	CYP1A2
DRD3	OPRD1
CRYZ	DECR1
DRD1	ADRB2
ADRA2C	APP
ADRA1D	ADRA1B
SNRPE	ELAVL1
CLDN10	CLDN1
ECM1	CFD
CHRM4	HTR1A
DRD3	ADRA2A
CHRM5	ADRA1D
MED1	ABCB4
CHRM2	ADRA2A
MMP3	MMP13
OPRM1	ADRA2B
GSTM1	GGH
TNF	MMP9
CHRM2	HTR1A
APP	ADRA2A
IDO1	MAOB
CHRM5	CHRM3
ITGA2	ITGB8
ADRA2C	CHRM2
CXCL2	APP
ECM1	TGFB2
RPS28	EIF4A2
ADH1B	CYP26A1
MMP1	MMP13
TNF	NFKBIA
AP2A1	CFTR
HSD17B3	UGT1A7
ARNT	ABCB1
ADRA2B	ADRA2A
RXRA	MED4
UGT2B11	SRD5A1
RAB3GAP1	DYNC1I2
BMPR2	GDF7
RANBP2	SPDL1
MED16	NCOR1
ADRA2B	OPRD1
UGT2B11	HSD17B3
RXRA	MED16
RAB3GAP1	DYNC1LI2
PTGFR	CHRM1
ADRA2A	OPRD1
CYCS	PPP2CB
HTR2A	HTR2C
ADRA2B	CNR1
DNAJC6	CFTR
ADRA2B	SST
APP	CHRM3
ADRA1D	CHRM3
DRD3	DRD2
CHRM4	DRD4
ADRA2B	CHRM2
FGF2	TGFB1
CHRM2	CFTR
CHRM5	ADRA1B
HIF1A	LRRK2
UGT1A7	ADH1B
PARK2	HERC5
ITGA2	LAMB1
ADRA1A	CHRM3
WNT4	WNT7A
MED14	FABP4
ADRA2C	HTR1A
DRD1	RXFP1
TLR4	IL8
LEP	IGF1
CAV3	EGFR
CLIP1	PDS5A
ADRA1A	HTR2C
ADRA1B	CHRM1
APC	PPP2CB
CHRM4	OPRM1
CHRM5	ADRA1A
ADRA1D	HTR2C
CHRM4	APP
APP	DRD4
RELA	PAWR
PPP3CA	PICALM
CHRM4	CHRM2
RPS28	SRP19
ADRA2C	OPRD1
SRP19	RPS26
PICALM	ARPC3
HLA-DRB1	FOS
DRD5	RXFP1
ALOX15	ALOX12
ARPC3	CFTR
HTR2A	KALRN
CHRM1	CHRM3
ARNT	MMP14
HTR2A	ADRA1B
ADH1B	GSTM2
RXFP1	PTGER2
ADRB1	DRD1
UGT2B11	ADH1B
ADRB2	RXFP1
COASY	ENPP1
ARNT	ABCG2
IL8	OPRD1
CHRM5	CHRM1
CYP1A2	ALOX15
TRIM2	MT2A
PTGFR	TRH
HDAC2	DKK1
CHRM5	APP
ADRA1A	TRH
MED1	CPT1A
ADRA2B	HTR1A
ADRA1B	HTR2C
CHRM4	OPRD1
DNAJC6	CTSZ
CHRM4	PTGER3
IL23R	IL4
RPA2	EP300
ARCN1	KIF1B
TNF	FOXP3
CHRM2	EGFR
PRKAR1A	BCL2L1
PTPN1	IFNGR1
HTR1A	OPRD1
ADRB1	RXFP1
PTGER3	CHRM2
VCP	IHH
CHRM2	IL8
PARK2	LRSAM1
F2	ADRA1B
OPRM1	ADRA2C
ADRA2C	CNR1
GPR27	PTGER4
DRD1	DRD5
ADRA1B	CHRM3
ANKRD1	NCOA1
PTGER3	OPRD1
CXCL2	CNR1
CHRM1	ITGB1
BCL2	IL6
TSR2	RPS26
CHRM3	KALRN
CHRM1	GNB4
RPA2	VCP
UGT1A7	HSD17B2
RXRA	RXRB
PICALM	CHRM2
COPA	ARHGAP1
AP2A1	F2
TRPV1	CNR1
CHRM5	KALRN
ADRA1A	F2
RPL13A	SRP68
AP2A1	MAPK1
EEF1A1	EEF1A2
CHRM3	GNB4
COPA	CD55
LRRK2	HBEGF
PPARG	MED17
CHRM5	PTGFR
ARIH1	MAPK3
PDS5A	PPP2CB
RXRA	MED17
ITGB1	ITGB8
CHRM5	F2
IL8	DRD4
DRD3	PTGER3
NCOA1	ABCB4
CHRM4	GNB4
PICALM	CFTR
SAR1B	CTSZ
MED16	EP300
PTGFR	CHRM3
TRH	CHRM3
DRD5	PTGER2
ANKRD1	NCOA6
CHRM5	TRH
COPA	KIF1B
ADRB1	GPR27
NR1D2	MED1
ADRA2C	SST
PPP3CA	AP2A1
CXCL2	SST
BMPR2	CHRDL1
CHRM1	KALRN
C4BPA	NFKBIA
UGT1A7	SRD5A1
UGT2B11	HSD17B2
ADRA2B	DRD4
COPA	DYNC1LI2
DRD5	ADRB2
CHRM5	GNB4
ECM1	APP
DCTN2	ARCN1
CHRM2	GNB4
ARIH1	STAT1
DYNC1I2	COPA
IL8	ADRA2A
HDAC1	APC
RPS28	SRPR
PRKAG2	TP53
UST	VCAN
DCTN2	COPA
DYNC1I2	ARCN1
APP	GNB4
DRD2	CXCL3
CXCL2	ADRA2C
SYVN1	IHH
ARCN1	DYNC1LI2
PTGFR	ADRA1B
CKAP5	DYNC1I2
CXCL2	OPRM1
CD55	DYNC1LI2
MED14	LEP
EGFR	ARPC3
RPS21	SRPR
CXCL1	HTR1A
CXCL3	APP
CXCL1	GNB4
CXCL2	ADRA2B
ADRA2C	CXCL3
MED16	FABP4
CXCL2	CHRM4
ADRA1B	KALRN
LEP	MED4
DRD1	PTGER2
ADRA1D	PTGFR
DYNC1I2	HLA-DRB1
IL10	IFNGR1
PTGFR	HTR2C
PTGFR	KALRN
ADRA2C	CXCL1
ADRA2B	IL8
HSP90AB1	NRP1
CXCL1	OPRD1
ARHGAP28	RHOB
CLIP1	SPDL1
DCTN2	HLA-DPB1
CXCL3	ADRA2A
SAR1B	HLA-DRB1
CXCL3	SST
IL8	GNB4
COPA	NCF2
HLA-DPB1	MT2A
FABP4	MED17
DYNC1I2	CD55
DRD1	GPR27
HLA-DRB1	DYNC1LI2
PTGER3	CXCL3
RPS26	SRP68
TGFB2	CFD
TGFB2	NR2C2
DNAJC6	CHRM2
ADRA2B	PTGER3
CXCL3	DRD4
IL7R	IFNG
TRH	GNB4
HLA-DPB1	SAR1B
PLA2G2A	CYP1A2
MYLIP	HERC5
ADRA2C	PTGER3
AP2A1	ADRB2
NR2C2	TGFB1
CXCL2	DRD4
GGH	GSTM2
CXCL1	ADRA2A
PICALM	ADRB2
ITGB3BP	PSEN2
CXCL2	ADRA2A
CYB5A	CYCS
AP2A1	CHRM2
RPS21	SRP68
CHRM4	IL8
PTGFR	APP
CHRM1	LAMB1
CXCL1	DRD2
CXCL1	DRD3
CYP1A1	NCOA6
ADRA1A	PTGFR
MED16	LEP
CHRM4	CXCL1
CXCL1	CHRM2
DRD3	CXCL3
CAMK2A	IFNG
DNAJC6	ARPC3
CXCL2	GNB4
PARK2	MYLIP
CXCL2	DRD3
ADRA2C	IL8
ADRB2	ARPC3
ADRA1A	APP
RAB3GAP1	DCTN2
ADRB1	DRD5
CLIP1	PPP2CB
DRD5	PTGER4
HLA-DRB1	AP2A1
CXCL3	GNB4
CHRM2	CXCL3
SST	GNB4
ADRA1D	APP
DCTN2	CD55
CXCL1	DRD4
RELA	CPT1A
HLA-DRB1	MT2A
DRD1	PTGER4
NCOA6	CPT1A
RELA	C4BPA
HLA-DRB1	TRIM2
RPS28	SRP68
ITGB3BP	PPP2CB
HTR2C	KALRN
HLA-DPB1	TRIM2
INTS1	TBP
DNAJC6	ADRB2
ADRB1	PTGER2
RPS26	SRPR
HLA-DPB1	AP2A1
TRIM2	ICAM1
SQSTM1	ITGB3BP
DRD5	GPR27
ITGB3BP	CLIP1
DCTN2	HLA-DRB1
ADRB1	PTGER4
ADRB2	GPR27
RXRA	ANKRD1
MYLIP	LRSAM1
NCOA6	EGR2
CXCL2	CHRM2
HTR2A	PTGFR
PRKAR1A	BAD
ITGB3BP	RANBP2
PTGER3	DRD4
CD55	ARCN1
ADRA2B	CXCL1
CXCL2	OPRD1
NCOA6	ABCB4
F2	GNB4
CNIH3	CTSZ
SPDL1	PPP2CB
MED16	PPARG
HTR1A	CXCL3
CXCL2	HTR1A
CHRM4	CXCL3
CAMK2A	IFNGR1
CXCL2	PTGER3
HLA-DPB1	DYNC1LI2
NCOA6	RARB
MED4	FABP4
ANKRD1	MED1
OPRM1	CXCL3
CXCL3	OPRD1
HLA-DPB1	DYNC1I2
ADRA2B	CXCL3
ITGB3BP	PDS5A
LEP	MED17
KALRN	GNB4
CXCL2	DRD2
CHRM2	ARPC3
ADRA1D	KALRN
CNR1	CXCL3
ADRA1A	KALRN
NCOA1	CPT1A
GPR27	PTGER2
BRD2	CYP19A1
IL8	IFNG
TNF	BCL2
IL1B	IL4
IGF1	FGF2
AKR1C3	HSD17B3
MMP9	IL6
PGR	NCOA1
TLR4	IL1B
FOXP3	IL7R
THRA	EP300
CX3CR1	IL8
MAOA	AOC3
BMP7	GDF7
BCL2	CCND1
HARS	GARS
TNF	TGFB1
MTOR	PPARG
SHBG	PRL
SCD	CYB5A
IL10	IL15
MAOB	AOC3
IL1B	TGFB1
TLR4	CCL2
ESR2	MAPK3
GADD45A	CDKN1A
IGF1	IL6
HSP90AA1	LRRK2
PGR	CCND1
HTR1A	SLC6A4
MT1G	MT1X
ELAVL1	CCND1
MT1X	MT1H
TP53	IL6
PRKCA	FOS
IL6	SERPINE1
HSD17B1	AKR1C3
HSP90AA1	ZAP70
CXCL2	IL1B
RXRB	PPARG
PRKCA	ITGB1
IFNGR1	IL6
VEGFA	ICAM1
ICAM1	IFNG
HDAC2	THRA
TP53	HSPB1
CXCL1	CX3CR1
IFNGR1	IL4
BCL2L1	RAF1
IL10	VEGFA
ESR2	NCOR1
HARS	YARS
MMP9	IL1B
CYP17A1	CYB5A
PCNA	TBP
ACE	SERPINE1
BRD2	IGF1
MMP1	TIMP2
BRD2	SHBG
TNF	BCL2L1
IGF1	TP53
IL1B	MMP2
NR5A1	CYP19A1
MMP3	TIMP2
HSP90AA1	HSPB1
IL23R	IL15
SH3KBP1	KIT
IL15	IL6
CXCL2	IL6
PTGS2	PTGER4
COL18A1	KDR
AKR1C3	HSD17B2
HTR3A	HTR2C
PCNA	EGFR
TIMP2	MMP7
GLE1	NUP155
PTGS2	NOS3
STAT1	FOS
CAMK2A	NOS3
MTOR	NFKBIA
PTGS2	PTGS1
HTR2A	HTR3A
PRLR	LEP
CAMK2A	SLC6A3
PTGS2	NOS2
IRS1	KIT
TNF	TP53
CXCL2	CX3CR1
PRLR	IL6
MMP1	CCL2
MTOR	MAPK3
BCL2	CDKN1A
EGFR	HSPB1
PPP3CA	BAD
VEGFA	PTEN
BCL2	IGF1
TP53	EGR1
TNF	LEP
TNF	MAPK1
NOS3	IL6
MTOR	EIF4G1
CALD1	CALM1
MTOR	BCL2L1
MMP3	IL1B
EGR2	EGR1
RELA	TLR5
DECR1	HMOX1
PTGS2	EGFR
PTEN	CCND1
MMP9	FGF2
NOS2	NCF1
VEGFA	ESR1
IL8	CFTR
MT1G	MT1H
IFNGR1	IL15
IRS1	KDR
MT1X	MT2A
F2	SERPINE1
TNF	SERPINE1
VEGFA	IL1B
VEGFA	F3
FGF2	MMP2
FGF2	THBS1
IL8	MAPK1
FOS	IGF1
MTOR	FKBP8
LDHA	SUCLG2
MMP1	IL1B
VEGFA	CCND1
MMP9	CCL2
NR5A1	CYP17A1
COL18A1	THBS1
PTPN1	MAPK1
TP53	TGFB1
PLA2G2A	MAPK3
GPC3	WNT4
PTGS2	PTGER3
PARK7	LRRK2
IRGM	ATG16L1
HSP90AA1	BCL2
NR5A1	NCOA1
ELAVL1	TP53
NOS3	HMOX1
PRKAR1A	PDE11A
MMP13	TIMP1
ELAVL1	PTGS2
CXCL2	CCL2
TNF	NOS3
F3	APP
RELA	PPP2CB
PLA2G2A	MAPK1
NCF2	NOS2
ITGA2	THBS1
MT1H	MT2A
IL7R	PRL
DDX50	GTPBP4
IFNG	CCL2
FGF2	IL6
CAMK2A	SCN5A
RELA	TP53
GDNF	FGF2
VEGFA	MMP1
TP53	FGF2
CYP1A2	CYB5A
PTEN	PARK7
IL1B	NFKBIA
MMP9	EGFR
TNFRSF1B	IL6
CXCL1	CCL2
IKBKG	CDKN1A
RELA	BCL2L1
NEDD4L	EGFR
IL1B	MMP13
PTGS2	PPARG
TLR4	PTGS2
MTOR	CCND1
TNF	F3
NR5A1	GATA4
F3	IL6
PAX2	WNT4
ITGA2B	ITGB8
PRKAG2	CFTR
IL10	BCL2
VEGFA	HMOX1
IL1B	TIMP1
PRKCA	PPP2CB
PTEN	IRS1
GPC3	WNT7A
NOS3	FGF2
MT1X	MT1F
IGF1	CCND1
CALM1	FOS
EGFR	IL6
MAP2K2	PPP2CB
BCL2	RAF1
G6PD	PGAM2
PTGS2	BCL2
IL1R2	IL1R1
CALM1	EGFR
TOP2A	YARS
PGR	IGF1
PGR	EGFR
CYCS	DECR1
LEP	FOS
NOS2	IL1B
TNF	IL15
PRKCA	RHOB
VEGFA	LEP
FBN1	VCAN
IL6	TIMP1
IL6	HMOX1
TP53	KDR
IL6	CCND1
NTRK3	IRS1
PTEN	BCL2
LEP	TRH
IL10	PTGS2
TNC	ITGA2B
RXRB	EP300
IGF1	CYP19A1
CALM1	CA2
HSP90AA1	PGR
PRLR	IL4
PGR	CYP19A1
CX3CR1	CXCL3
MAOB	MAOA
DHFR	PCNA
ROCK2	MAPK1
MED16	THRA
HSP90AA1	FKBP8
EGFR	TGFB1
PINK1	SNCA
BCL2L1	IL6
PRL	CYP19A1
HDAC1	THRA
PRLR	IFNG
FOS	FGF2
PTEN	EGR1
CYB5A	DECR1
CAV3	ITGB1
NEDD4L	RET
ACSL5	PNPLA2
IL10	HMOX1
IKBKG	MTOR
TLR4	ICAM1
CX3CR1	CXCL14
MMP9	MAPK3
MMP9	TP53
MMP3	CCL2
LEP	IL7R
CAV3	NOS3
ROCK2	MAPK3
IL10	PRLR
PTGFR	IL8
SH3KBP1	RET
HTR2A	SLC6A4
IL10	TNFRSF1B
COL18A1	FGF2
TNF	IGF1
IDO1	IFNG
HFE	SLC40A1
LEP	SERPINE1
TLR5	IL8
VEGFA	PPARG
MTOR	MAPK1
IGF1	NOS3
KIT	IL4
IRS1	ESR1
BCL2L1	EGFR
PRLR	IL15
BCAR1	ITGA2
CYCS	TP53
NEDD4L	KIT
MT1G	MT2A
STAT1	TP53
F3	ICAM1
NEDD4L	KDR
BAX	CCND1
CALM1	MAPK3
FGF2	IL1B
PTGS2	CCL2
BCL2	IL4
IL8	MAPK3
ELAVL1	PRKAG2
VEGFA	KRAS
F3	SERPINE1
TNF	IL1R1
RXRA	HDAC1
COPA	AP2A1
SHBG	CYP19A1
IFNGR1	LEP
VEGFA	MMP14
BCL2	FGF2
THRA	MED4
HDAC2	RXRA
MTOR	IL6
IL6	ESR1
IKBKG	IRS1
TRH	SST
SMS	SST
IGF1	SST
MAOA	SLC6A4
TLR4	IL1R1
CCL2	TGFB1
JPH1	GDAP1
IL23R	LEP
CAV3	SCN5A
STAT1	IL4
VEGFA	MAPK3
IL4	TGFB1
IFNGR1	PRL
F3	CCL2
SH3KBP1	KDR
PRL	SST
ABHD12	CNR1
IL15	IFNG
NOS3	ICAM1
THRA	MED17
IL10	MMP9
HSP90AA1	MAPK3
BCL2	PGR
BCL2	PPP2CB
ADAM17	EGFR
TLR5	IL6
IL6	MMP2
TNF	PPARG
CALM1	HSP90AA1
GPX4	AKR1B1
AKR1C2	AKR1C3
TRPV1	CALM1
EGR1	DUSP1
THBS1	ITGB8
PINK1	HTRA2
CYP1A1	CYP1A2
PTGS2	IL4
ACOT4	ACOT2
STAT1	SP110
EGFR	TNC
CYP1A1	CYB5A
HDAC2	RXRB
RXRB	MED14
RELA	CCL2
RXRB	HDAC1
NOS2	NOS3
DHFR	DECR1
ACOT1	ACOT2
RELA	HDAC1
ITGB8	LAMB1
HNRNPCL1	DHX8
DYNC1LI2	TUBB1
MMP9	MAPK1
CAMK2A	EP300
G6PD	TP53
IDO1	IL10
GLO1	AOC3
MMP1	FGF2
VEGFA	ACE
IKBKG	CCND1
MED14	THRA
IRS1	IL6
TOP1	TP53
DRD2	PPP2CB
TNC	ITGB8
LRRK2	APC
PRKCA	ITGB8
YARS	EEF1A1
IL8	MMP2
TNC	FGF2
PTGS2	DECR1
TNF	HMOX1
IL10	NOS2
DYNC1I2	TUBB1
BRCA1	PGR
SLC6A4	DRD4
CHRM2	CHRM1
ELAVL1	VEGFA
BCL2	CTSZ
RELA	ROCK2
INTS1	ZNF687
PTEN	MAPK3
GABRB3	GABRB2
NRP1	PLXNC1
CALM1	MAPK1
RPS6KA3	FOS
EP300	EGR1
FOXP3	IL15
PRKCA	SLC6A3
IL23R	PRL
RXRB	MED17
CKAP5	TUBB1
PARK7	TP53
KRAS	CCND1
HSP90AA1	EEF1A1
MTOR	HIF1A
[truncated: 4,168 more rows]
